# Supplementary material for: Elucidation of a dynamic interplay between a beta-2 adrenergic receptor, its agonist, and stimulatory G protein
Source: PubMed Central journal article supplement (PMC10013855; doi:10.1073/pnas.2215916120), 2023-02-28
Supplement: pnas.2215916120.sapp.pdf [file pnas.2215916120.sapp.pdf]

## Supporting Information for

### Elucidation of a dynamic interplay between a beta-2 adrenergic receptor, its agonist and stimulatory G protein

Yanxiao Han<sup>a</sup>, John R. D. Dawson<sup>a,b</sup>, Kevin R. DeMarco<sup>a</sup>, Kyle C. Rouen<sup>a,b</sup>, Slava Bekker<sup>a,c</sup>, Vladimir Yarov-Yarovoy<sup>a,d</sup>, Colleen E. Clancy<sup>a,e</sup>, Yang K. Xiang<sup>e,f</sup>, and Igor Vorobyov<sup>a,e,1</sup>

<sup>a</sup>Department of Physiology and Membrane Biology, University of California, Davis, CA 95616;

<sup>b</sup>Biophysics Graduate Group, University of California, Davis, CA 95616;

<sup>c</sup>Department of Science and Engineering, American River College, Sacramento, CA 95841;

<sup>d</sup>Department of Anesthesiology and Pain Medicine, University of California, Davis, CA 95616;

<sup>e</sup>Department of Pharmacology, University of California, Davis, CA 95616;

<sup>f</sup>VA Northern California Health Care System, Mather, CA 95655.

<sup>1</sup>To whom correspondence may be addressed. Email: [ivorobyov@ucdavis.edu](mailto:ivorobyov@ucdavis.edu).

#### **This PDF file includes:**

Tables S1 to S5

Figures S1 to S14

**Table S1.** Molecular systems simulated, their simulation times (in ns or  $\mu$ s), average boost potentials ( $\Delta V$ ) and standard deviations (std) in kcal/mol for GaMD runs. All simulation systems were first subject to 90 ns long equilibration (eq) MD runs after which microsecond-long unbiased Anton 2 MD or enhanced sampling GaMD simulations commenced. See main text “*Materials and Methods*” section for more details.

| System name                           | Eq MD | Anton 2 MD  | GaMD                                                                                                                                               |                                                |
|---------------------------------------|-------|-------------|----------------------------------------------------------------------------------------------------------------------------------------------------|------------------------------------------------|
| $\beta_2$ AR – NE(+)                  | 90 ns | 2.5 $\mu$ s | Run 1, 600 ns, $\Delta V = 14.56$ , std = 4.29<br>Run 2, 600 ns, $\Delta V = 15.14$ , std = 4.35<br>Run 3, 600 ns, $\Delta V = 14.65$ , std = 4.29 |                                                |
| $\beta_2$ AR – G <sub>s</sub> – NE(+) | 90 ns | Run 1       | 5.0 $\mu$ s                                                                                                                                        | Run 1, 600 ns, $\Delta V = 18.60$ , std = 4.78 |
|                                       |       | Run 2       | 5.0 $\mu$ s                                                                                                                                        | Run 2, 600 ns, $\Delta V = 18.95$ , std = 4.86 |
|                                       |       | Run 3       | 7.5 $\mu$ s                                                                                                                                        | Run 3, 600 ns, $\Delta V = 16.73$ , std = 4.64 |
|                                       |       | Run 4       | 5.0 $\mu$ s                                                                                                                                        |                                                |

**Table S2.** MM-PBSA interaction free energies ( $\Delta G$ ) between NE(+) and  $\beta_2$ AR or  $\beta_2$ AR – G<sub>s</sub> (in kcal/mol) along with their standard errors of mean (SEM) computed using block averages, enthalpic ( $\Delta H$ ) and entropic ( $-T\Delta S$ ) components. Calculations were based on GaMD trajectories (600 ns each). See “*Materials and Methods*” section of the main text for a description of the reweighting procedure.

| System                                 | $\Delta H$ | $-T\Delta S$ | $\Delta G \pm \text{SEM}$ | Reweighted $\Delta H$ |
|----------------------------------------|------------|--------------|---------------------------|-----------------------|
| $\beta_2$ AR-GaMD-run1                 | -26.00     | 8.93         | -17.07 $\pm$ 1.38         | -25.96                |
| $\beta_2$ AR-GaMD-run2                 | -25.61     | 5.30         | -20.31 $\pm$ 0.44         | -26.74                |
| $\beta_2$ AR-GaMD-run3                 | -26.25     | 7.71         | -18.54 $\pm$ 1.35         | -27.69                |
| $\beta_2$ AR-G <sub>s</sub> -GaMD-run1 | -25.87     | 6.58         | -19.29 $\pm$ 1.46         | -27.72                |
| $\beta_2$ AR-G <sub>s</sub> -GaMD-run2 | -24.22     | 7.15         | -17.07 $\pm$ 0.66         | -22.21                |
| $\beta_2$ AR-G <sub>s</sub> -GaMD-run3 | -22.22     | 5.19         | -17.03 $\pm$ 0.54         | -21.29                |

**Table S3.** Amino acid residue (AA) contact information between different components of  $G_s$  and  $\beta_2AR$  proteins from Anton 2 MD runs of  $\beta_2AR - G_s - NE(+)$  system. Close contacts are defined as AAs within 3 Å of each other. The stable contacts are defined as AA interacting more than 50% of the simulation time. The average percentage interaction time was calculated by averaging the interaction times of the stable AA contacts in the third column.

| <b>Contacts</b>                                             |       | <b>Number of stable contacts</b> | <b>Average percentage interaction time</b> |
|-------------------------------------------------------------|-------|----------------------------------|--------------------------------------------|
| AA in $\beta_2AR$ interact with $G_s\alpha$ $\alpha 5$      | Run 1 | 26                               | 86.7%                                      |
|                                                             | Run 2 | <b>22</b>                        | <b>85.0%</b>                               |
|                                                             | Run 3 | 25                               | 89.5%                                      |
|                                                             | Run 4 | 25                               | 88.5%                                      |
| AA in $G_s\alpha$ $\alpha 5$ interact with $\beta_2AR$ ICL3 | Run 1 | 4                                | 53.0%                                      |
|                                                             | Run 2 | 3                                | 69.8%                                      |
|                                                             | Run 3 | 4                                | 67.2%                                      |
|                                                             | Run 4 | 4                                | 62.9%                                      |
| AA in $\beta_2AR$ ICL3 interact with $G_s\alpha$ $\alpha 5$ | Run 1 | 3                                | 65.7%                                      |
|                                                             | Run 2 | 3                                | 72.5%                                      |
|                                                             | Run 3 | 3                                | 66.6%                                      |
|                                                             | Run 4 | 2                                | 75.3%                                      |
| AA in $\beta_2AR$ ICL3 interact with $G_s$                  | Run 1 | 5                                | 70.6%                                      |
|                                                             | Run 2 | 9                                | 88.1%                                      |
|                                                             | Run 3 | 10                               | 78.8%                                      |
|                                                             | Run 4 | 3                                | 72.7%                                      |

**Table S4.** Pearson correlation coefficients ( $r$ ) calculated for any two MD simulation averaged geometric criteria characterized in main-text Figure 4 based on Anton 2 MD runs of  $\beta_2$ AR –  $G_s$  – NE(+) system: **A** –  $G_s\alpha$  A161 to E299 distance, **B** – angle between two vectors of  $G_s\alpha$ AH and  $G_s\alpha$ Ras domains, **C** –  $G_s\alpha$ AH and  $G_s\alpha$ Ras interdomain distance, **D** –  $\beta_2$ AR NpxxY to  $G_s\alpha$   $\alpha$ 5 distance, **E** –  $\beta_2$ AR to  $G_s\alpha$   $\alpha$ 5 distance, **F** –  $G_s\alpha$   $\alpha$ 1 to  $\alpha$ 5 distance.

|       |         |         |         |         |         |
|-------|---------|---------|---------|---------|---------|
| Row # | A and B |         |         |         |         |
| 1     | 0.61    |         |         |         |         |
|       | A and C | B and C |         |         |         |
| 2     | 0.99    | 0.69    |         |         |         |
|       | A and D | B and D | C and D |         |         |
| 3     | -0.36   | -0.71   | -0.46   |         |         |
|       | A and E | B and E | C and E | D and E |         |
| 4     | 0.53    | 0.07    | 0.46    | 0.55    |         |
|       | A and F | B and F | C and F | D and F | E and F |
| 5     | -0.65   | -0.63   | -0.65   | -0.06   | -0.80   |

**Table S5.** MM-PBSA interaction free energies ( $\Delta G$ ) between  $\beta_2$ AR and  $G_s$  (in kcal/mol), along with their standard errors of mean (SEM) computed using block averages, enthalpic ( $\Delta H$ ) and entropic ( $-T\Delta S$ ) components based on GaMD trajectories (600 ns each). See the “Materials and Methods” section of the main text for a description of the reweighting procedure.

| System                         | $\Delta H$ | $-T\Delta S$ | $\Delta G \pm \text{SEM}$ | Rewighted $\Delta H$ |
|--------------------------------|------------|--------------|---------------------------|----------------------|
| $\beta_2$ AR- $G_s$ -GaMD-run1 | -142.3     | 97.9         | -44.4 $\pm$ 11.9          | -144.4               |
| $\beta_2$ AR- $G_s$ -GaMD-run2 | -154.2     | 98.8         | -55.3 $\pm$ 13.8          | -135.0               |
| $\beta_2$ AR- $G_s$ -GaMD-run3 | -119.5     | 94.4         | -25.1 $\pm$ 18.3          | -132.2               |

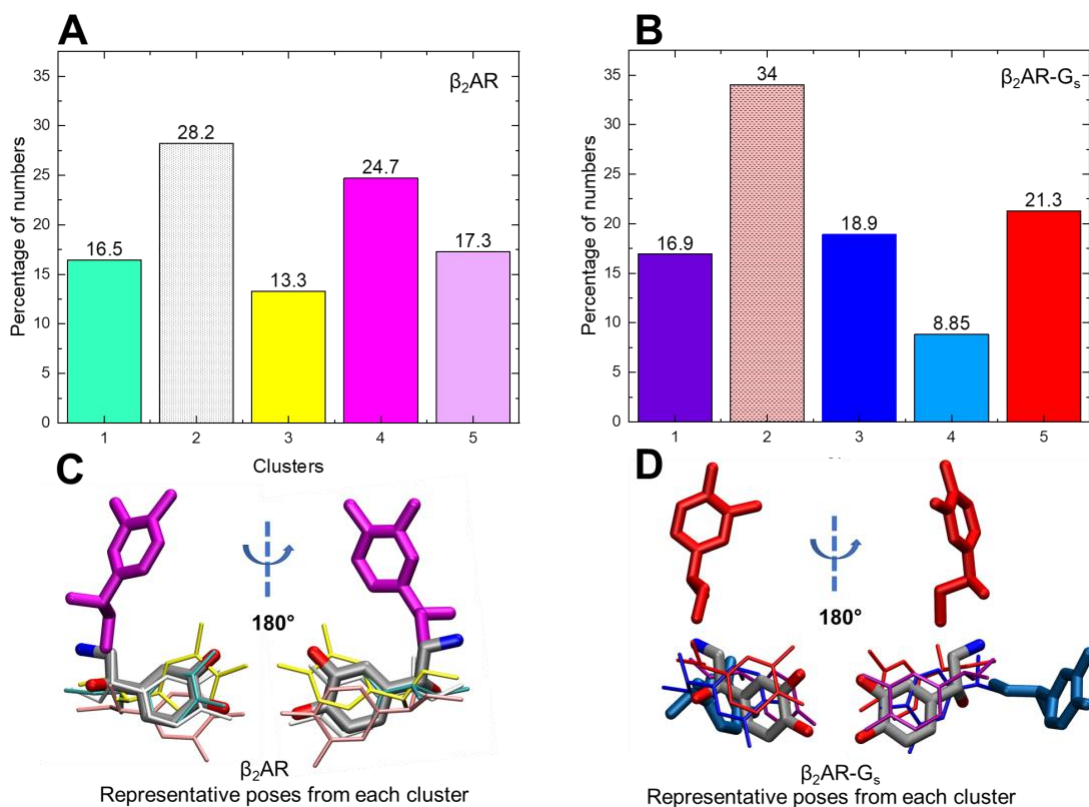

**Fig. S1. (A)** Clustering for binding poses of NE(+) in  $\beta_2AR$  Anton 2 run, percentage of pose numbers out of all poses in each cluster is shown on top of each bar. **(B)** Clustering for binding poses of NE(+) in  $\beta_2AR-G_s$  (Four Anton 2 runs combined), percentage of pose numbers out of all poses in each cluster is shown on top of each bar. **(C)** Representative binding poses found for  $\beta_2AR$ , the coloring of molecules matches the histogram in (A), the white molecule corresponding to cluster 2 in (A). **(D)** Representative binding poses for  $\beta_2AR-G_s$ , the coloring of molecules matches the histogram in (B), the red molecule with thin bonds corresponds to cluster 2.

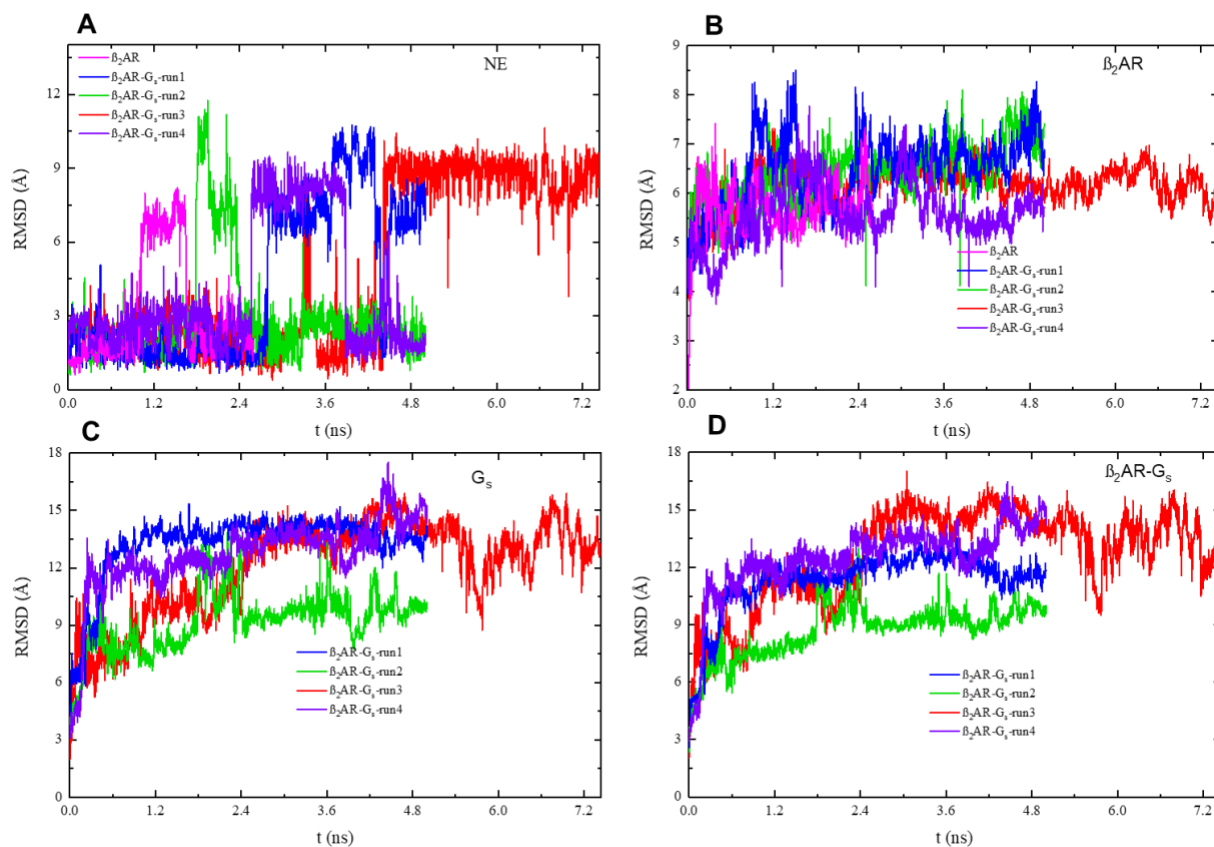

**Fig. S2.** RMSD time series of **(A)** NE(+) in different Anton 2 runs, trajectories were aligned to the  $\beta_2\text{AR}$  without loops with the first frame as reference; **(B)**  $\beta_2\text{AR}$  in different Anton 2 runs, trajectories were aligned to  $\beta_2\text{AR}$  with the first frame as reference; **(C)**  $G_s$  in different Anton 2 runs, trajectories were aligned to  $G_s$  with the first frame as reference; **(D)**  $\beta_2\text{AR-G}_s$  complex in different Anton 2 runs, trajectories were aligned to  $\beta_2\text{AR-G}_s$  with the first frame as reference.

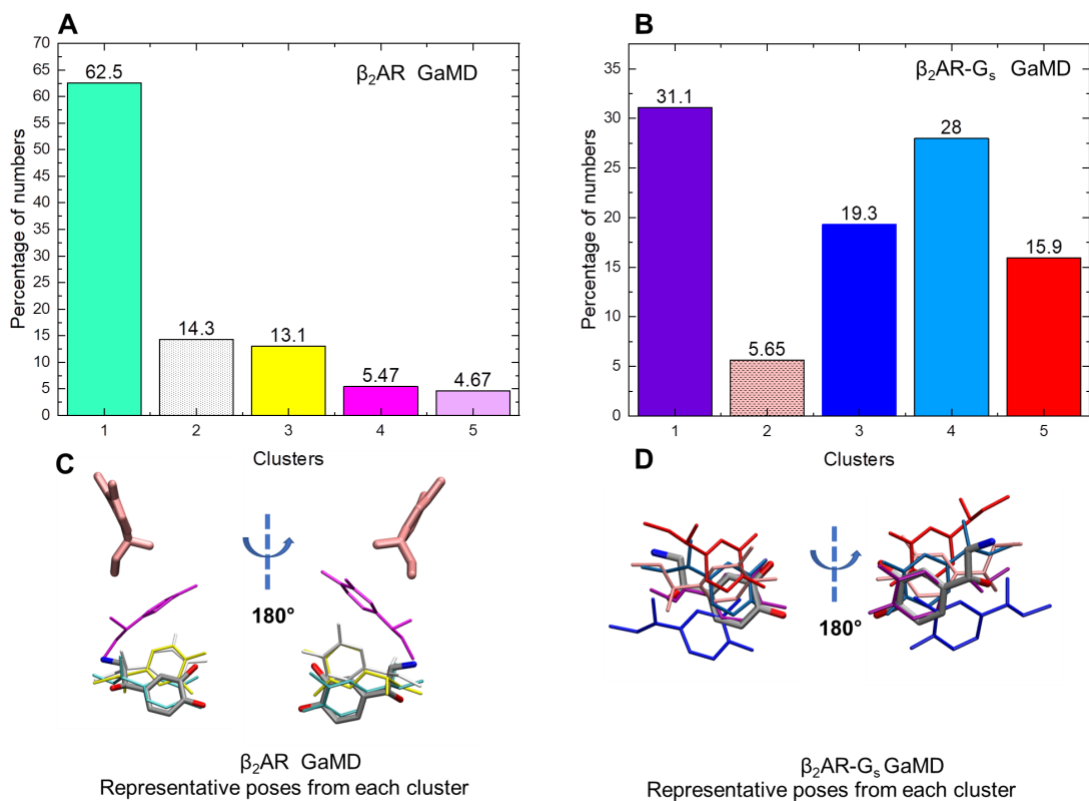

**Fig. S3.** (A) Clustering for binding poses of NE(+) in  $\beta_2$ AR GaMD runs, percentage of pose numbers out of all poses in each cluster is shown on top of each bar. (B) Clustering for binding poses of NE(+) in  $\beta_2$ AR-G<sub>s</sub> GaMD runs, percentage of pose numbers out of all poses in each cluster is shown on top of each bar. (C) Representative binding poses found for  $\beta_2$ AR, the coloring of molecules matches the histogram in (A), the white molecule corresponds to cluster 2 in (A). (D) Representative binding poses for  $\beta_2$ AR-G<sub>s</sub>, the coloring of molecules matches the histogram in (B), the pink molecule corresponds to cluster 2.

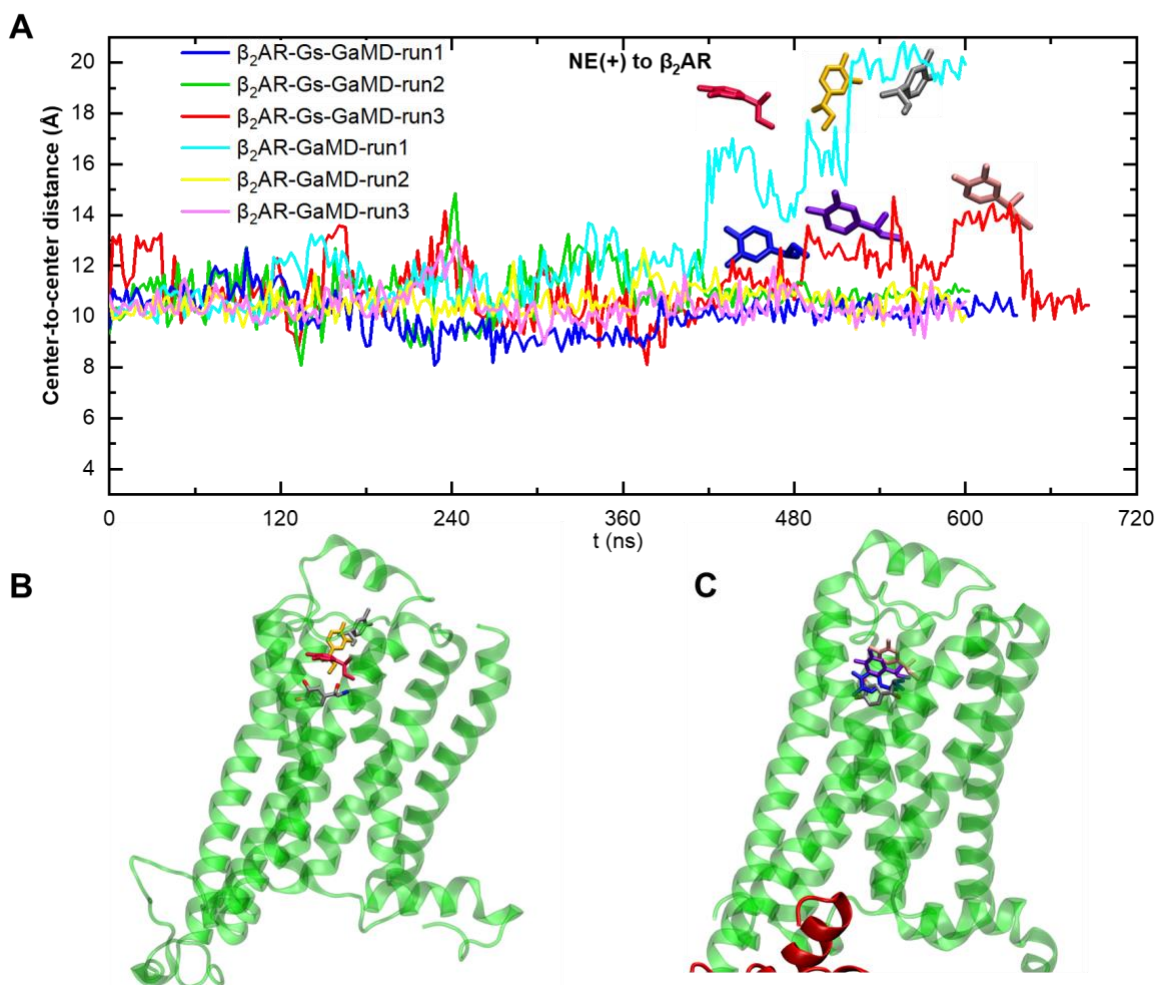

**Fig. S4. (A)** Time series of center-to-center distance between NE(+) and  $\beta_2$ AR geometric centers based on GaMD simulations; **(B)** Representative binding poses of NE(+) from  $\beta_2$ AR-GaMD-run1 (NE(+) colors correspond to those in panel A); **(C)** Representative binding poses of NE(+) from  $\beta_2$ AR-Gs-GaMD-run3 (NE(+) colors correspond to those in panel A).



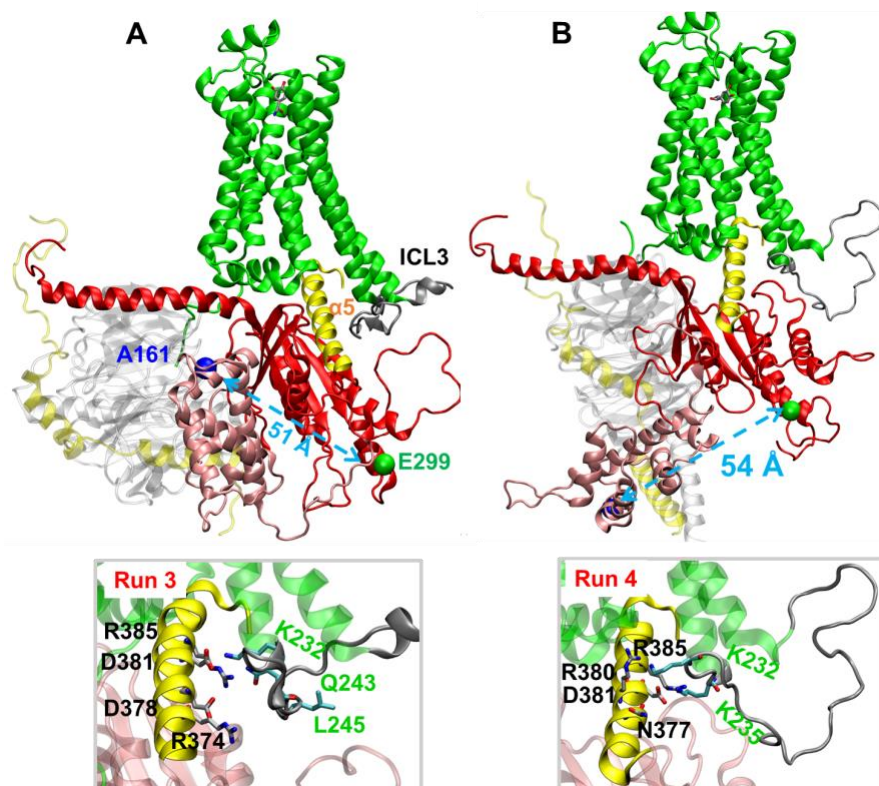

**Fig. S5.** All-atom Anton 2 MD simulations of the active state of the human  $\beta_2\text{AR-G}_s$  complex with NE(+) bound. **(A)** run 3 with the inset at the bottom. **(B)** run 4 with the inset at the bottom. Final structures from 5  $\mu\text{s}$  long unbiased MD simulation runs on Anton 2. Individual protein chains / subunits are shown in the ribbon representation using different colors and labeled.  $\text{G}_s\alpha$   $\alpha 5$  helix and  $\beta_2\text{AR}$  intracellular loop 3 (ICL3) are shown as yellow and dark gray.  $\text{G}_s\alpha$   $\alpha$ -helical domain residue A161 and Ras-like domain residue E299 are shown as blue and green balls, and distances between them are shown by light-blue dashed arrows.

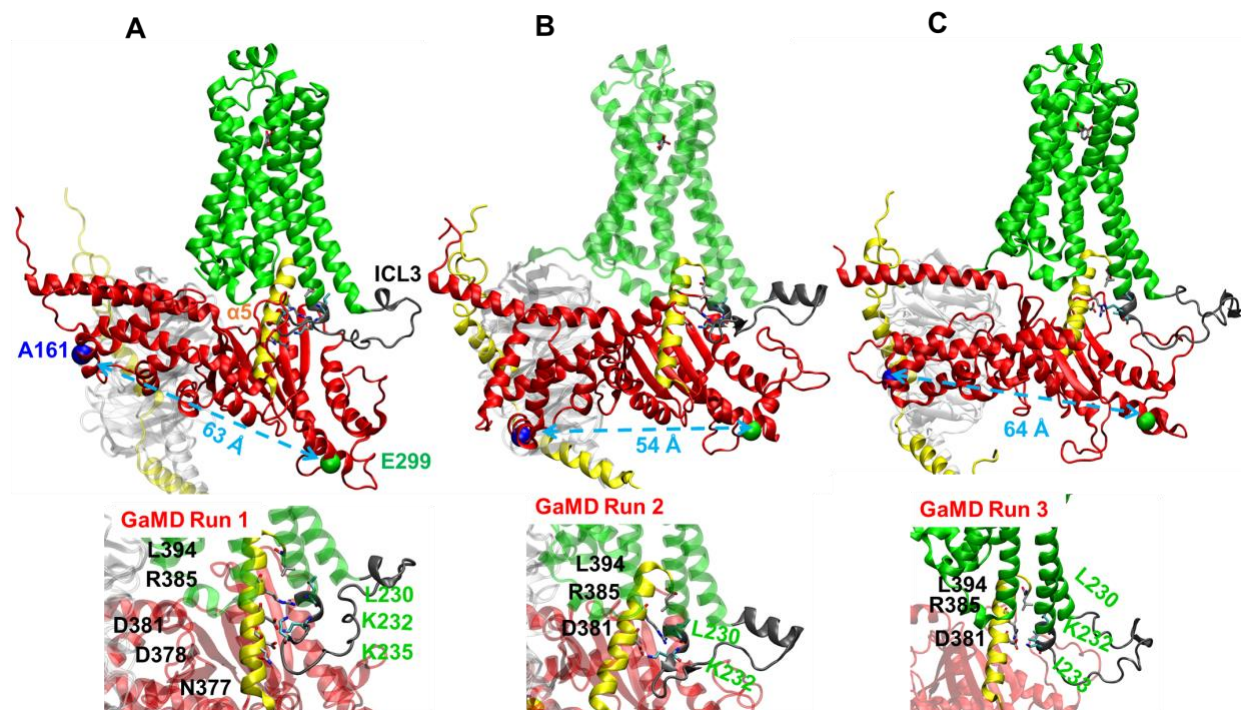

**Fig. S6.** All-atom GaMD simulations of the active state of the human  $\beta_2$ AR- $G_s$  complex with NE(+) bound. **(A)** GaMD run 1 with the inset at the bottom. **(B)** GaMD run 2 with the inset at the bottom. **(C)** GaMD run 3 with the inset at the bottom. Final protein structures from 600-ns long GaMD simulation runs are shown. Individual protein chains / subunits are shown in the ribbon representation using different colors and labeled.  $G_s\alpha$   $\alpha 5$  helix and  $\beta_2$ AR intracellular loop 3 (ICL3) are shown as yellow and dark gray.  $G_s\alpha$   $\alpha$ -helical domain residue A161 and Ras-like domain residue E299 are shown in blue and green balls, and distances between them are shown by light-blue dashed arrows.

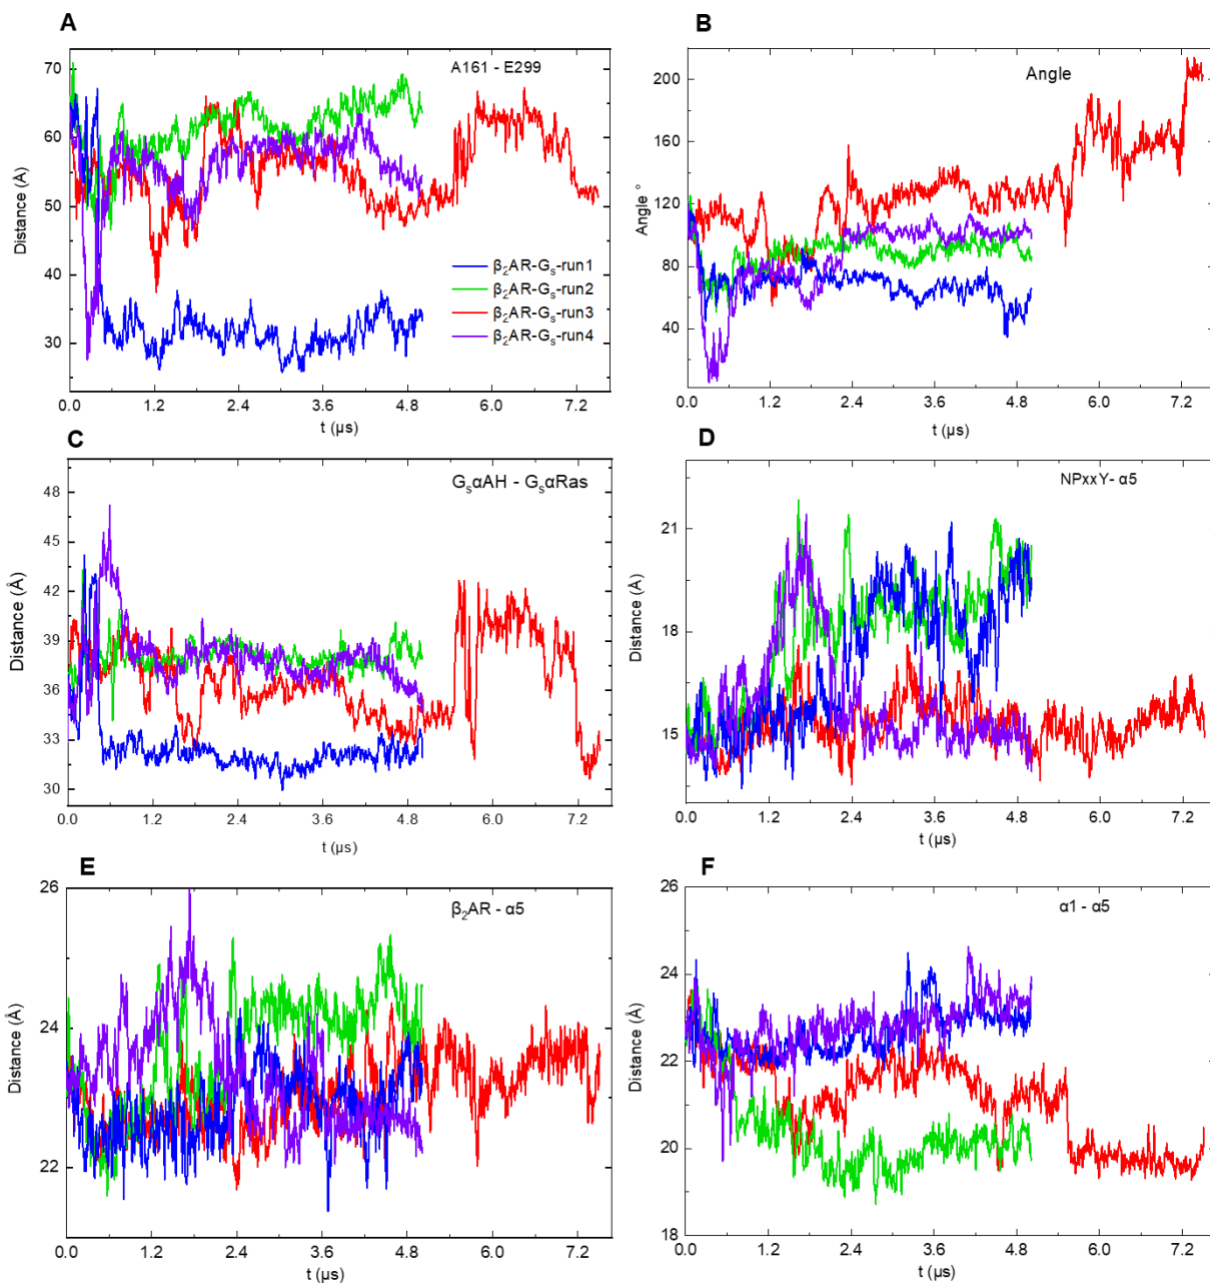

**Fig. S7.** Time series of geometric criteria from all-atom Anton 2 MD simulations of  $\beta_2\text{AR-G}_s\text{-NE(+)}$  system: **(A)**  $\text{G}_s\alpha$  A161 to E299 distance indicating protein conformational changes (opening or closing); **(B)** angle between two vectors found in  $\text{G}_s\alpha\text{AH}$  and  $\text{G}_s\alpha\text{Ras}$  domains indicating the relative orientation of two domains. Vector 1 goes through  $\text{G}_s\alpha\text{AH}$  and A161 centers, vector 2 goes through  $\text{G}_s\alpha\text{Ras}$  and E299 centers (see main-text Figure 4C); **(C)** distance between  $\text{G}_s\alpha\text{AH}$  and  $\text{G}_s\alpha\text{Ras}$  domains; **(D)** distance between NPxxY (on the TM7 of  $\beta_2\text{AR}$ ) and  $\text{G}_s\alpha$   $\alpha 5$  helix indicating possible partial  $\beta_2\text{AR-G}_s$  dissociation; **(E)** distance between  $\beta_2\text{AR}$  and  $\text{G}_s\alpha$   $\alpha 5$  indicating possible partial  $\beta_2\text{AR-G}_s$  dissociation; **(F)**  $\text{G}_s\alpha$   $\alpha 1$  to  $\alpha 5$  distance indicating relative movement of  $\alpha 1$  and  $\alpha 5$  helices. (The geometric centers were used for the distance and angle measurements.)

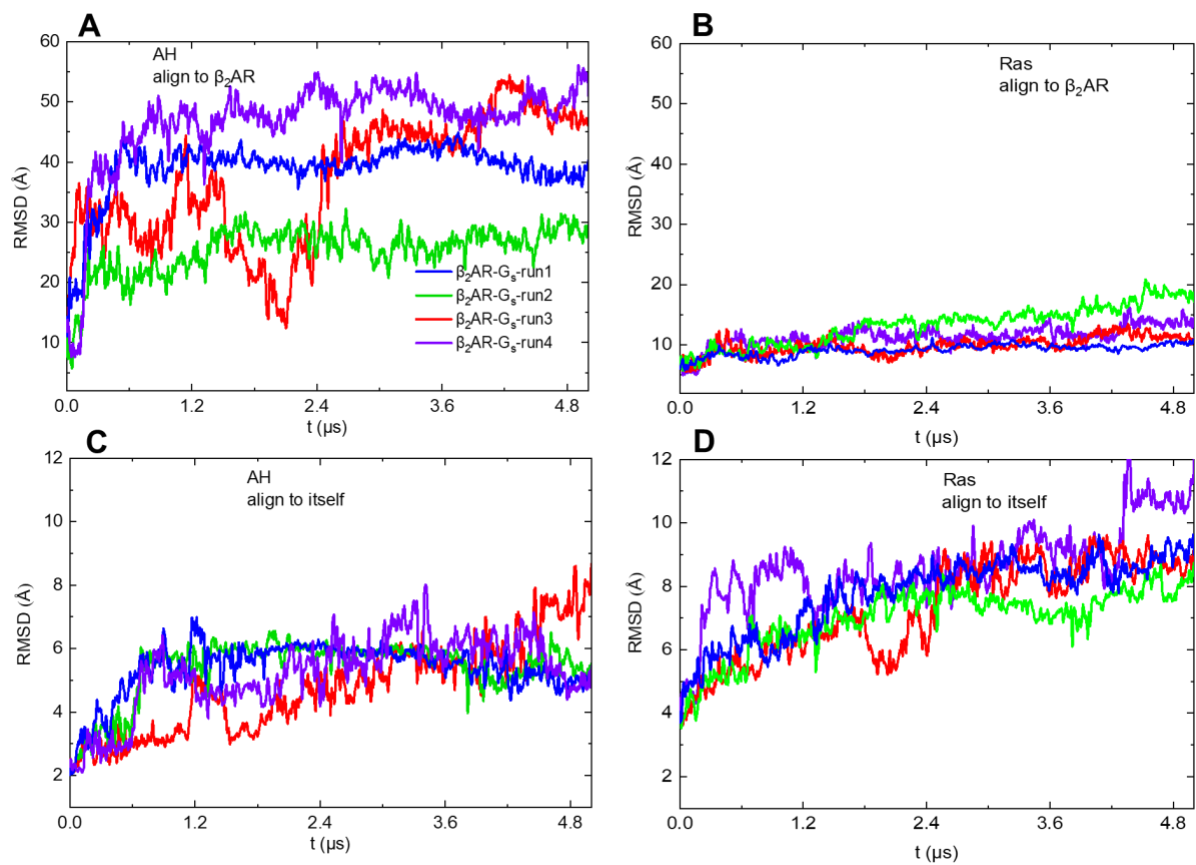

**Fig. S8.** RMSD time series from all-atom Anton 2 MD simulations of  $\beta_2$ AR-G<sub>s</sub>-NE(+) system: **(A)** G<sub>s</sub>αAH domain C<sub>α</sub> atoms aligned with respect to  $\beta_2$ AR; **(B)** G<sub>s</sub>αRas domain C<sub>α</sub> atoms aligned with respect to  $\beta_2$ AR; **(C)** G<sub>s</sub>αAH domain C<sub>α</sub> atoms aligned with respect to its initial structure; **(D)** G<sub>s</sub>αRas domain C<sub>α</sub> atoms aligned with respect to its initial structure.

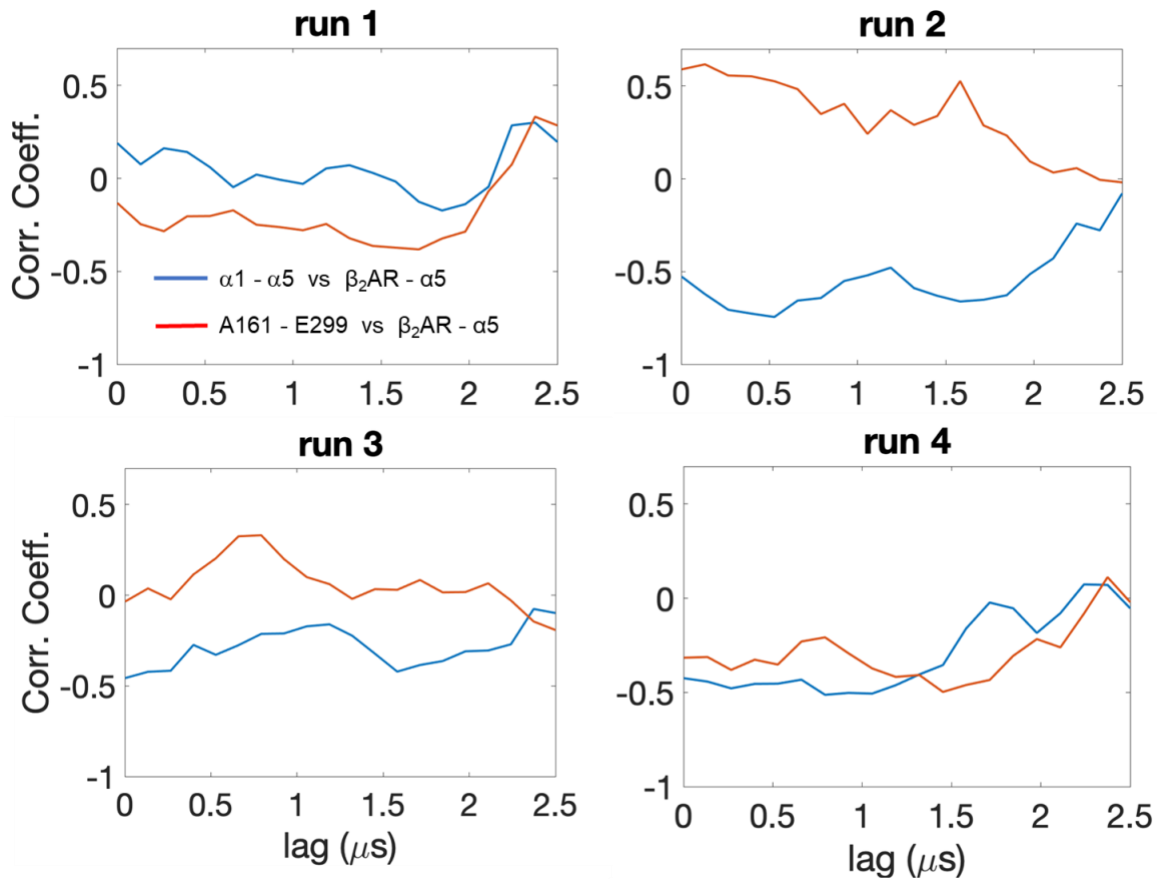

**Fig. S9.** Pearson correlation coefficients (Corr. Coeff)  $r$  as a function of lag time calculated for  $G_s\alpha$   $\alpha 1 - \alpha 5$  distance vs.  $\beta_2\text{AR} - G_s\alpha$   $\alpha 5$  distance (blue) and  $G_s\alpha$  A161 - E299 distance vs.  $\beta_2\text{AR} - G_s\alpha$   $\alpha 5$  distance (red). These data are based on all-atom Anton 2 MD simulations of  $\beta_2\text{AR} - G_s - \text{NE}(+)$  system.

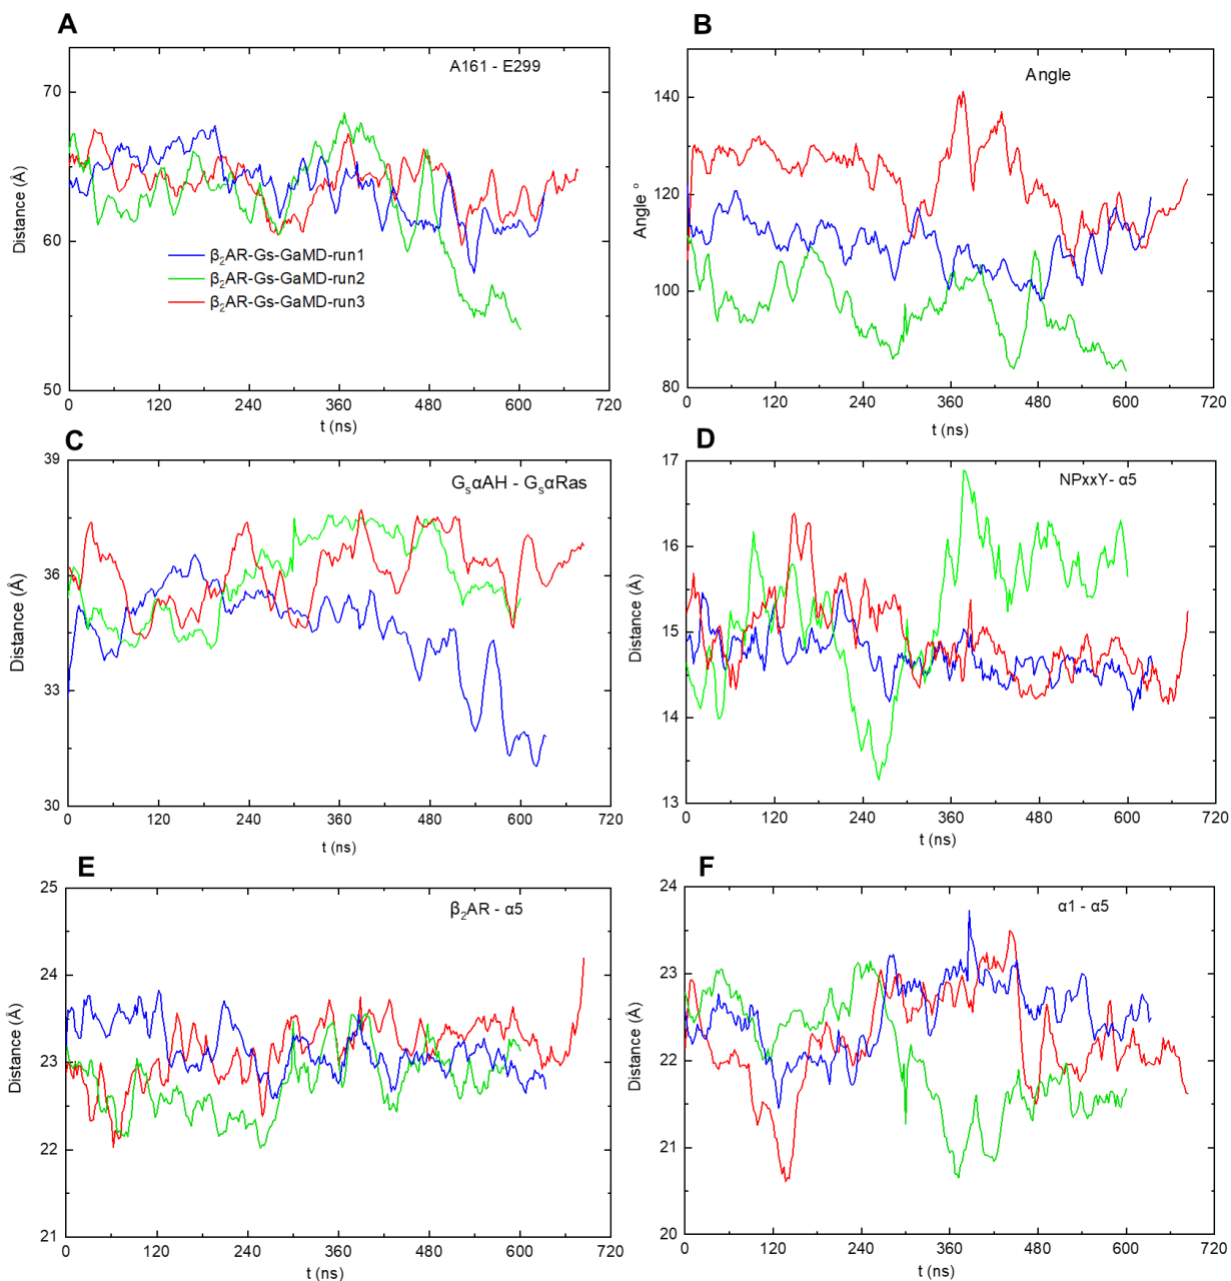

**Fig. S10.** Time series of geometric criteria from all-atom GaMD simulations of  $\beta_2\text{AR-G}_s\text{-NE}(+)$  system: **(A)**  $\text{G}_s\alpha$  A161 to E299 distance indicating protein conformational changes (opening or closing); **(B)** Angle between two vectors found in  $\text{G}_s\alpha\text{AH}$  and  $\text{G}_s\alpha\text{Ras}$  domains indicating the relative orientation between the two domains. Vector 1 goes through  $\text{G}_s\alpha\text{AH}$  and A161 centers, vector 2 goes through  $\text{G}_s\alpha\text{Ras}$  and E299 centers (see main text Fig. 4C); **(C)** Distance between  $\text{G}_s\alpha\text{AH}$  and  $\text{G}_s\alpha\text{Ras}$  domains; **(D)** Distance between NPxxY (on the TM7 of  $\beta_2\text{AR}$ ) and  $\text{G}_s\alpha$   $\alpha 5$  indicating possible partial  $\beta_2\text{AR-G}_s$  dissociation; **(E)** Distance between  $\beta_2\text{AR}$  and  $\text{G}_s\alpha$   $\alpha 5$  indicating possible partial  $\beta_2\text{AR-G}_s$  dissociation; **(F)** Distance between  $\text{G}_s\alpha$   $\alpha 1$  and  $\alpha 5$  indicating relative movement of helices  $\alpha 1$  and  $\alpha 5$ . (The geometric centers were used for the distance and angle measurements.)

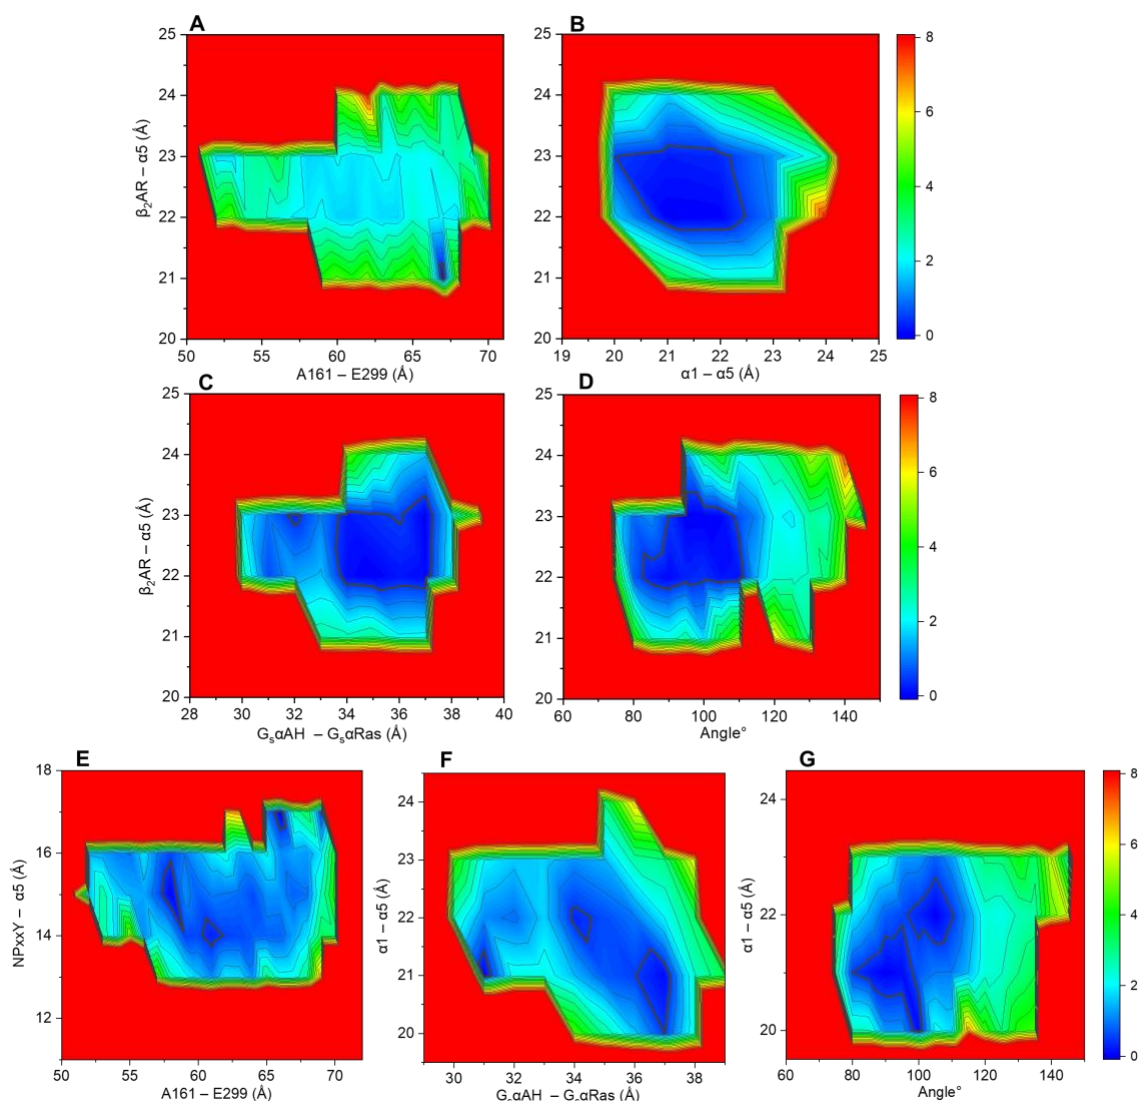

**Fig. S11.** 2D potential of mean force (PMF) or free energy profiles (in kcal/mol) based on  $G_s\alpha$  conformation and its possible partial dissociation from  $\beta_2AR$  from all-atom GaMD simulations of the active state of the human  $\beta_2AR-G_s$  complexes with bound NE(+): **(A)** A161 to E299 distance indicating  $G_s\alpha$  open or closed conformation is shown as X-axis. Distance between  $G_s\alpha$   $\alpha 5$  and  $\beta_2AR$  indicating possible partial  $\beta_2AR-G_s$  dissociation is shown as Y-axis. **(B)**  $G_s\alpha$   $\alpha 1$  to  $\alpha 5$  distance is shown as X-axis. Distance between  $\alpha 5$  and  $\beta_2AR$  indicating possible partial  $\beta_2AR-G_s$  dissociation is shown as Y-axis. **(C)** Distance between  $G_s\alpha AH$  and  $G_s\alpha Ras$  is set as X-axis. Distance between  $G_s\alpha$   $\alpha 5$  and  $\beta_2AR$  indicating possible partial  $\beta_2AR-G_s$  dissociation is shown as Y-axis. **(D)** Angle between two vectors, one from  $G_s\alpha AH$  and the other from  $G_s\alpha Ras$ , is set as X-axis (shown in Figure 4C). Distance between  $\alpha 5$  and  $\beta_2AR$  indicating possible partial  $\beta_2AR-G_s$  dissociation is shown as Y-axis. **(E)** Distance between  $G_s\alpha$  A161 and E299 is shown as X-axis.  $\beta_2AR$  NPxxY to  $G_s\alpha$   $\alpha 5$  distance is shown as Y-axis. **(F)** Distance between  $G_s\alpha AH$  and  $G_s\alpha Ras$  is set as X-axis. Distance between  $G_s\alpha$   $\alpha 5$  and  $\alpha 1$  is shown as Y-axis. **(G)** Angle between two vectors, one from  $G_s\alpha AH$  and the other from  $G_s\alpha Ras$  (shown in Figure 4C), is set as X-axis. Distance between  $G_s$   $\alpha 5$  and  $\alpha 1$  is shown as Y-axis. All data are from GaMD simulations. (The geometric centers were used for the distance and angle measurements.)

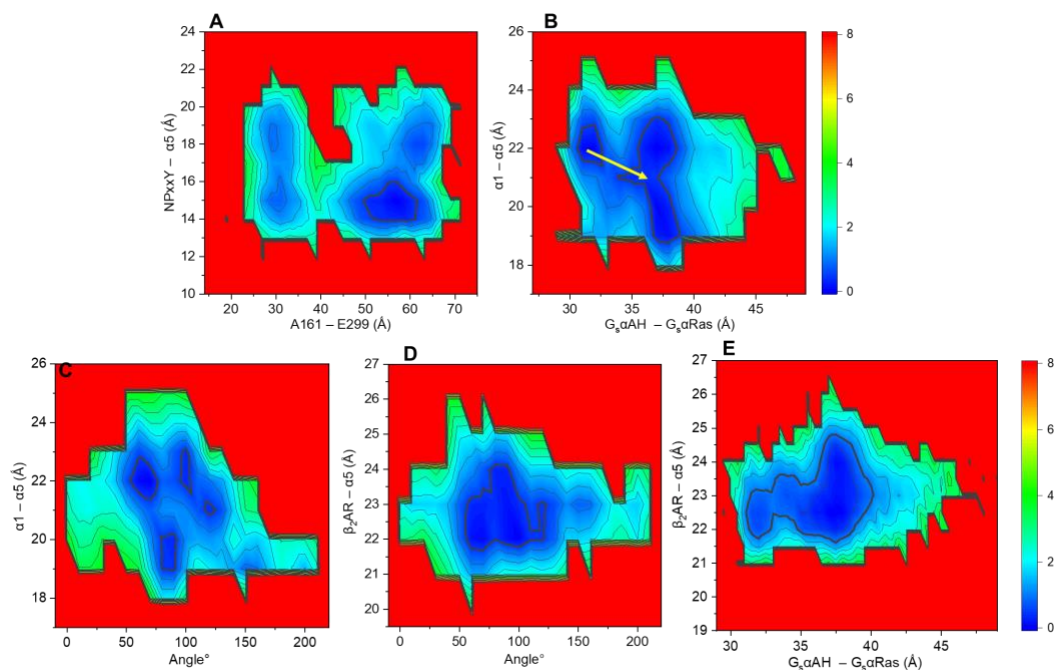

**Fig. S12.** 2D potential of mean force (PMF) or free energy profiles (in kcal/mol) from all-atom Anton 2 MD simulations of the active state of the human  $\beta_2\text{AR-G}_s$  complexes with bound NE(+). **(A)** Distance between  $G_s\alpha$  A161 and E299 is shown as X-axis.  $\beta_2\text{AR}$  NPxxY to  $G_s\alpha$   $\alpha 5$  distance is shown as Y-axis. **(B)** Distance between  $G_s\alpha\text{AH}$  and  $G_s\alpha\text{Ras}$  is set as X-axis. Distance between  $G_s\alpha$   $\alpha 5$  and  $\alpha 1$  is shown as Y-axis. **(C)** Angle between two vectors, one from  $G_s\alpha\text{AH}$  and the other from  $G_s\alpha\text{Ras}$ , is set as X-axis. Distance between  $G_s\alpha$   $\alpha 5$  helix and  $\alpha 1$  helix is shown as Y-axis. **(D)** Angle between two vectors, one from  $G_s\alpha\text{AH}$  domain and the other from  $G_s\alpha\text{Ras}$  domain, is set as X-axis; distance between  $G_s\alpha$   $\alpha 5$  and  $\beta_2\text{AR}$  is shown as Y-axis. **(E)** Distance between  $G_s\alpha\text{AH}$  and  $G_s\alpha\text{Ras}$  domains is set as X-axis; distance between  $\alpha 5$  and  $\beta_2\text{AR}$  is shown as Y-axis. (The geometric centers were used for the distance and angle measurements.)



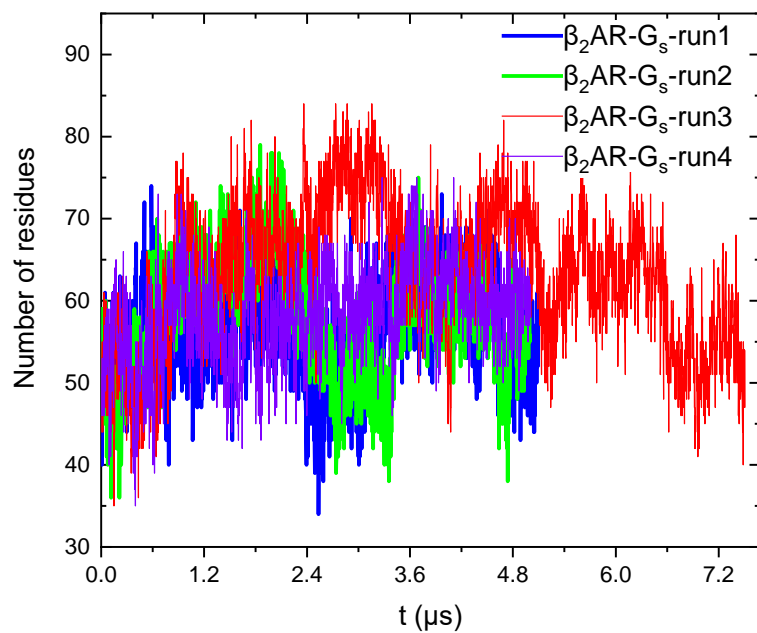

**Fig. S13.** Time series of the number of amino acid residues (AAs) in the binding interface between  $\beta_2\text{AR}$  and  $\text{G}_s$  from all-atom Anton 2 MD simulations of  $\beta_2\text{AR-G}_s\text{-NE(+)}$  system. The AAs in the binding interface were defined as those within 3 Å of either  $\beta_2\text{AR}$  or  $\text{G}_s$ .

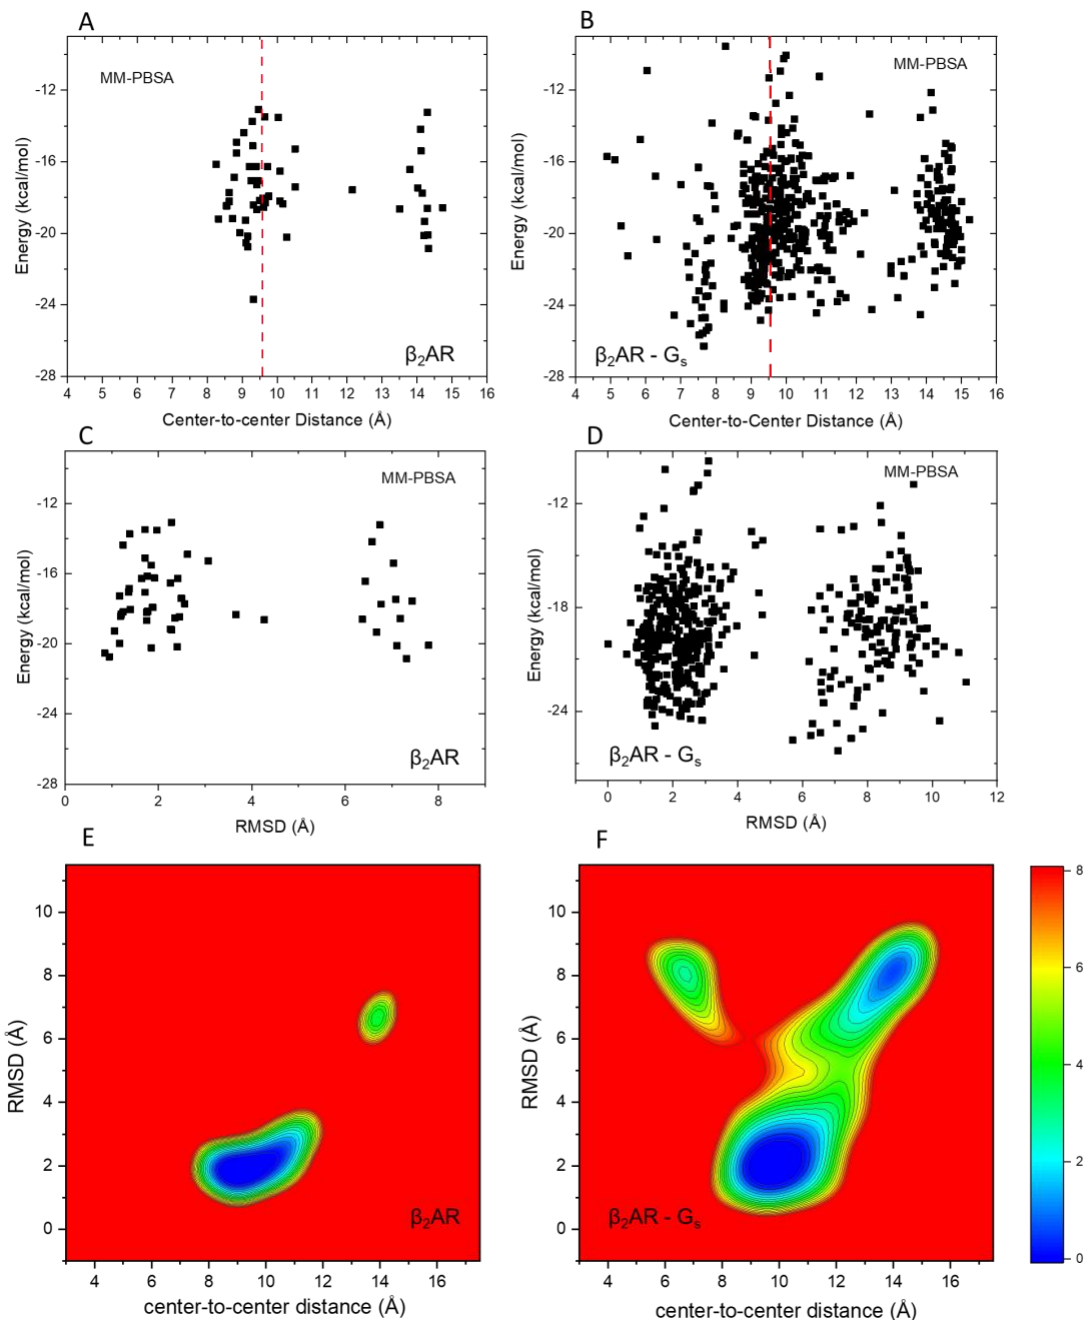

**Fig. S14.** (A) Scatter plot of MM-PBSA binding energies between NE(+) and  $\beta_2$ AR with their center-to-center distances in  $\beta_2$ AR only system. (B) Scatter plot of MM-PBSA binding energies between NE(+) and  $\beta_2$ AR with their center-to-center distances in  $\beta_2$ AR- $G_s$  system. (C) Scatter plot of MM-PBSA binding energies between NE(+) and  $\beta_2$ AR with RMSDs of NE(+) in  $\beta_2$ AR only system. (D) Scatter plot of MM-PBSA binding energies between NE(+) and  $\beta_2$ AR with RMSDs of NE(+) in  $\beta_2$ AR- $G_s$  system. (E) 2D PMF based on RMSD of NE(+) and center-to-center distance between NE(+) and  $\beta_2$ AR captured in the  $\beta_2$ AR only system. (F) 2D PMF based on RMSD of NE(+) and center-to-center distance between NE(+) and  $\beta_2$ AR captured in the  $\beta_2$ AR- $G_s$  systems. All plots are based on Anton 2 simulations, the vertical red dashed line in panels A and B indicates the initial center-to-center distance between NE(+) and  $\beta_2$ AR. (The geometric centers were used for the distance measurements.)
